# Supplementary material for: Transcriptome Analysis of Potato Infected with the Necrotrophic Pathogen Alternaria solani
Source: MDPI journal article supplement (doi:10.3390/plants10102212), 2021-10-18
Supplement: s1 [file s1]

**Supplementary Table S1.** Primer pair sequences used for qRT-PCR validation of RNA sequencing.

| Transcript ID/gene | Primer name    | Primer sequence       |
|--------------------|----------------|-----------------------|
| mRNA_3291          | As_3291_F      | GTTCCGTCACCTACAAGGCA  |
|                    | As_3291_R      | CAGTGGACACCCTCGATCTG  |
| mRNA_8720          | As_8720_F2     | GTGAAGACGACTCCCAAGGA  |
|                    | As_8720_R2     | AACGTCGGTGGTACGGTAAG  |
| mRNA_10760         | As_10760_F2    | ACCTCGCCATCACCTACAAC  |
|                    | As_10760_R2    | TGAGCGTACTCGTTGACCTG  |
| mRNA_10750         | As_10750_F     | AACGATACTTGCGACGTGGT  |
|                    | As_10750_R     | CAACCAGTCCAGCCATGACA  |
| mRNA_9018          | As_9018_F2     | AACCCAAGTACCGAGGAGGT  |
|                    | As_9018_R2     | TCTGTTCTCGGGTGTCTCCT  |
| mRNA_11966         | As_11966_F2    | ATCTCTCTGGCGCAATTCAT  |
|                    | As_11966_R2    | CAAGACTGCCATTGACGAGA  |
| mRNA_29            | As_29_F2       | CATTAATGGCAGCGTGATTG  |
|                    | As_29_R2       | AAATGCTGCGAGCACTTCTT  |
| mRNA_9008          | As_9008_F2     | CTGCCTCCATTACGTTTCGTT |
|                    | As_9008_R2     | CTCGGTCAATGCTGAGTCAA  |
| mRNA_8569          | As_8569_F2     | GGAGCCATCGAGATCCTACA  |
|                    | As_8569_R2     | CGCATTCCAGTAGCAGTTCA  |
| $\beta$ tubulin    | As_B tubulin_F | GCTCCCACTCCTTCCGCGC   |
|                    | As_B tubulin_R | GGAGGTGGAGTTACCGACAA  |
